# Supplementary material for: Comparison of a Real-Time Multiplex PCR and Sequetyping Assay for Pneumococcal Serotyping
Source: PubMed Central journal article supplement (PMC4559314; doi:10.1371/journal.pone.0137349), 2015-09-03
Supplement: pone.0137349.s002.pdf [file pone.0137349.s002.pdf]

**Table 1:** Primer and probe data for the sequential real-time multiplex PCR assay

| GenBank accession no.( <i>gene</i> ) | Primer/probe ID                | Primer/probe sequence (5' -3')   | Probe dye | Probe special chemistry | Quencher (3') | nM  |
|--------------------------------------|--------------------------------|----------------------------------|-----------|-------------------------|---------------|-----|
| CR931632 ( <i>wzy</i> )              | 1-F                            | TTTCATCCCTATGTGTGGTATAG          |           |                         |               | 300 |
|                                      | 1-R                            | GCTTTAGAAGGTAGAGTTAACAAC         | FAM       | LNA <sup>b</sup>        | BHQ1          | 300 |
| CR931633 ( <i>wzy</i> )              | <b>1-Probe</b>                 | TGCCAAAGCCAGCCAT                 |           |                         |               | 100 |
|                                      | 2-F                            | TGTTATCCCATATAAGAACCGAGTGT       |           |                         |               | 300 |
|                                      | 2-R                            | AAAATTACCCAAAAGCTATCCAA          | FAM       | “T” <sup>d</sup> =BHQ1  | BHQ1          | 300 |
| CR931634 ( <i>galU</i> )             | <b>2-Probe</b>                 | TTGCAATT“T”CAATTTTTTTGCCCCAATCTC |           |                         |               | 200 |
|                                      | 3-F                            | CCACTAAAGCTTTGGCAAAAAGAAA        |           |                         |               | 300 |
|                                      | 3-R                            | CCCGAACGTAAAGCTTCTTCA            | HEX       | “T” <sup>d</sup> =BHQ1  | BHQ1          | 300 |
| CR931635 ( <i>wzy</i> )              | <b>3-Probe</b>                 | TTGTAGACCGCCCCACAA“T”TCATTTTGT   |           |                         |               | 200 |
|                                      | 4-F                            | GCTTCTGCTGTAAGTGTGTGC            |           |                         |               | 300 |
|                                      | 4-R                            | CACCACCATAGTAACCAAAGTTCC         | CY5       |                         | BHQ2          | 300 |
| CR931637 ( <i>wzy</i> )              | <b>4-Probe</b>                 | TTCCACAAAAGAAGAGCCTACAGGTAACCCCA |           |                         |               | 100 |
|                                      | 5-F                            | CATGATTTATGCCCTCTTGCAA           |           |                         |               | 300 |
|                                      | 5-R                            | GACAGTATAAGAAAAAGCAAGGGCTAA      | HEX       | “T” <sup>d</sup> =BHQ1  | BHQ1          | 300 |
| CR931639 ( <i>wciP</i> )             | <b>5-Probe</b>                 | TCTTCTTCTCA“T”CGTTTCCGCATGCTTTT  |           |                         |               | 200 |
|                                      | 6A/6B/6C/6D-F                  | GTTTGCCTAGAGTATGGGAAGG           |           |                         |               | 200 |
|                                      | 6A/6B/6C/6D-R                  | TAGCCTTTCTGAAAACATTTAGCG         | FAM       | “T” <sup>d</sup> =BHQ1  | BHQ1          | 200 |
| EF538714 ( <i>wciN</i> )             | <b>6A/6B/6C/6D-Probe</b>       | TGTTCTGCC“T”GAGCAACTGGTCTTGATC   |           |                         |               | 200 |
|                                      | 6C/6D-F                        | TTGGGATGATTGGTCGTATTAG           |           |                         |               | 200 |
|                                      | 6C/6D-R                        | CTCTTCAATTAGTTCTTCAGTTCG         | FAM       | LNA <sup>b</sup>        | BHQ1          | 200 |
| CR931643 ( <i>wzy</i> )              | <b>6C/6D-Probe</b>             | CCACGCAATTCGCCATC                |           |                         |               | 100 |
|                                      | 7F/7A-F                        | ATGAAGGCTTTGGTTTGACAGG           |           |                         |               | 200 |
|                                      | 7F/7A-R                        | ATTCTCGCCATCAATTGCATATTC         | CY5       |                         | BHQ2          | 200 |
| CR931648 ( <i>wzx</i> )              | <b>7F/7A-Probe</b>             | ACACCACTATAGGCTGTTGAGACTAACGCACA |           |                         |               | 100 |
|                                      | 9V/9A-F                        | AGGTATCCTATATACTGCTTTAGG         |           |                         |               | 300 |
|                                      | 9V/9A-R                        | CGAATCTGCCAATATCTGAAAG           | HEX       | LNA <sup>b</sup>        | BHQ1          | 300 |
| CR931653 ( <i>wzy</i> )              | <b>9V/9A-Probe</b>             | ACA“CATTGACA”CCGCT               |           |                         |               | 100 |
|                                      | 11A/11D-F                      | AAATGGTTTGGATATGGTTTGTGG         |           |                         |               | 300 |
|                                      | 11A/11D-R                      | AGTGCTAACTGTAAAACCTTGATTATGAG    | CY5       |                         | BHQ2          | 300 |
| CR931660 ( <i>wzx</i> )              | <b>11A/11D-Probe</b>           | ATTCCAACCTTCTCCAATTTCTGCCACGG    |           |                         |               | 100 |
|                                      | 12F/12A/12B/44/46-F            | GCACCCACGGGTAAATATTCTAC          |           |                         |               | 300 |
|                                      | 12F/12A/12B/44/46-R            | CAACTAAGAACCAAGGATCCACAG         | CY5       |                         | BHQ2          | 300 |
|                                      | <b>12F/12A/12B/44/46-Probe</b> | TGCCACCAACACCAGGTCCAGGT          |           |                         |               | 200 |

|                  |                                |                                                |     |                        |      |     |
|------------------|--------------------------------|------------------------------------------------|-----|------------------------|------|-----|
| CR931662 (wzy)   | 14-F                           | AGAGTGTATGAGGAATCC                             | FAM | “T” <sup>d</sup> =BHQ1 | BHQ1 | 300 |
|                  | 14-R                           | ATATATCTACTGTAGAGGGAAT                         |     |                        |      | 300 |
|                  | 14- <b>Probe</b>               | CGCCAAGTAACA“T”TTCCATTCCATT                    |     |                        |      | 100 |
| CR931663 (wzy)   | 15A/15F-F                      | AATTGCCTATAAACTCATTGAGATAG                     | FAM | LNA <sup>b</sup>       | BHQ1 | 200 |
|                  | 15A/15F-R                      | CCATAGGAAGGAAATAGTATTTGTTC                     |     |                        |      | 200 |
|                  | 15A/15F- <b>Probe</b>          | CCC <u>G</u> CA <u>A</u> ACTCT <u>G</u> TCCT   |     |                        |      | 100 |
| CR931668 (wzy)   | 16F-F                          | TAATGTTATGACCTTGGTAATCTTCCC                    | HEX | “T” <sup>d</sup> =BHQ1 | BHQ1 | 300 |
|                  | 16F-R                          | TCCCAAAGGATAATCAATAACTTTTAGAAG                 |     |                        |      | 300 |
|                  | 16F- <b>Probe</b>              | AGCCATAAGTCT“T”CCAAATGCTTAACCGCT               |     |                        |      | 100 |
| CR931673 (wzy)   | 18C/18A/18B//18F-F             | TCGATGGCTAGAACAGATTTATGG                       | HEX |                        | BHQ1 | 200 |
|                  | 18C/18A/18B//18F-R             | CCATTGTCCTGTAAAGACCATTG                        |     |                        |      | 200 |
|                  | 18C/18A/18B//18F- <b>Probe</b> | AGGGAGTTGAATCAACCTATAATTTGCCCC                 |     |                        |      | 100 |
| CR931675 (wzy)   | 19A-F                          | CGCCTAGTCTAAATACCA                             | FAM |                        | BHQ1 | 200 |
|                  | 19A-R                          | GAGGTCAACTATAATAGTAAGAG                        |     |                        |      | 200 |
|                  | 19A- <b>Probe</b>              | TATCAATGAGCCGATCCGTCCTT                        |     |                        |      | 100 |
| CR931678 (wzy)   | 19F-F                          | TGAGGTTAAGATTGCTGATCG                          | CY5 | LNA <sup>b</sup>       | BHQ1 | 300 |
|                  | 19F-R                          | CACGAATGAGAACTCGAATAAAAG                       |     |                        |      | 300 |
|                  | 19F- <b>Probe</b>              | CGC <u>A</u> CT <u>G</u> TCA <u>A</u> TTCACTTC |     |                        |      | 100 |
| CR931682 (wcywV) | 22F/22A-F                      | TCTATTAATAAACCATTGGAATTGAAACG                  | HEX | “T” <sup>d</sup> =BHQ1 | BHQ1 | 200 |
|                  | 22F/22A-R                      | TCGCAATTGAAGACCACATAAACTG                      |     |                        |      | 200 |
|                  | 22F/22A- <b>Probe</b>          | TCCGTAAT“T”CGCTTATGGGCACATTCTCCA               |     |                        |      | 200 |
| CR931683 (wzy)   | 23A-F                          | CTCCCCTCCATTACCCATTTGG                         | CY5 | “T” <sup>d</sup> =BHQ2 | BHQ2 | 200 |
|                  | 23A-R                          | TGAAGAAAGTGCTGTTTGTGAACC                       |     |                        |      | 200 |
|                  | 23A- <b>Probe</b>              | AGCTAGAAC“T”CCCACACTCCCTACTCCCA                |     |                        |      | 100 |
| CR931685 (wzy)   | 23F-F                          | GACAGCAACGACAATAGTCATCTC                       | CY5 | “T” <sup>d</sup> =BHQ2 | BHQ2 | 300 |
|                  | 23F-R                          | TCCATCCCAACCTAACACACTTC                        |     |                        |      | 300 |
|                  | 23F- <b>Probe</b>              | ATTGTGTCCA“T”AACCCCTTCGTCTGATTTCCAAAG          |     |                        |      | 200 |
| CR931702 (wzy)   | 33F/33A/37-F                   | GGAAGTGGTTCAGCAACTATACG                        | HEX | “T” <sup>d</sup> =BHQ1 | BHQ1 | 200 |
|                  | 33F/33A/37-R                   | GGTTCTAAGACCGTCTGAAATACC                       |     |                        |      | 200 |
|                  | 33F/33A/37- <b>Probe</b>       | CCCCAAATAGGAC“T”TTTCTGCCATGCCAAA               |     |                        |      | 200 |

<sup>a</sup>Abbreviations: FAM, 6-carboxyfluorescein; HEX, hexachloro-6-carboxyfluorescein; ROX, 6-carboxy-X-rhodamine; CY5, indodicarbocyanine; BHQ, black hole quencher; ID, identification; LNA, locked nucleic acid.

<sup>b</sup>Locked nucleic acid nucleotides are underlined.

<sup>d</sup>“T” black hole quencher placed internally on the thymidine, highlighted with a green background. Table adopted from Pimenta *et al* [40].
