# Supplementary material for: Comparison of a Real-Time Multiplex PCR and Sequetyping Assay for Pneumococcal Serotyping
Source: PubMed Central journal article supplement (PMC4559314; doi:10.1371/journal.pone.0137349), 2015-09-03
Supplement: pone.0137349.s003.pdf [file pone.0137349.s003.pdf]

## Sequotyping

Sequotyping was performed according to Leung *et al* [41] with minor modifications: the PCR reaction comprised 12.5  $\mu$ l 1X KAPA Taq Ready Mix<sup>®</sup> (KAPA Biosystems, Boston, MA), 1  $\mu$ l of primer mix (Table 2), 2  $\mu$ l gDNA (diluted 1:10), 8.5  $\mu$ l nuclease/RNase-free H<sub>2</sub>O (Applied Biosystems) in a final volume of 25  $\mu$ l. Thermal cycling consisted of an initial denaturation at 95°C for 5 min, followed by 30 cycles of denaturation at 95°C for 30 s, annealing at 65°C for 30 s, and extension at 72°C 90 s employing an Applied Biosystems<sup>®</sup> 2720 Thermal Cycler (Applied Biosystems). PCR products were separated by electrophoresis in 1.5% agarose gel (SeaKem LE Agarose; Lonza, Rocklnd, ME) for 45 min at 80 V in a 1X Tris-acetate EDTA buffer. Ethidium bromide-stained DNA products were visualized under UV illumination and sized by using a 1-kb DNA molecular size marker (HyperLadder<sup>®</sup> 1kb; Bioline).

Table 2: Sequotyping assay PCR reaction mix for 80 reactions

| Reagent (initial concentration) | 1 Reaction ( $\mu$ l) | X80 Reactions ( $\mu$ l) | Final Concentration |
|---------------------------------|-----------------------|--------------------------|---------------------|
| 2x Mastermix                    | 12.5                  | 1000                     | 1X                  |
| Cps Primer_F 10 uM              | 1                     | 80                       | 400nM               |
| Cps Primer_R 10 uM              | 1                     | 80                       | 400nM               |
| dH2O                            | 8.5                   | 680                      |                     |
| DNA                             | 2                     |                          |                     |
| total                           | 25                    | 2000                     |                     |
